# Supplementary material for: Occurrence and Removal of Microplastics in Tertiary Wastewater Treatment Plants: A Case Study of Three Plants in Zhengzhou, China
Source: MDPI journal article supplement (doi:10.3390/pr12040803), 2024-04-16
Supplement: s1 [file s1]

**Supplementary material for:**  
**Occurrence and Removal of Microplastics in Tertiary Wastewater  
Treatment Plants: A case Study of Three Plants in Zhengzhou,  
China**

Yang Li\*, Tongtong Qin, Xinjie Bai, Wenjing Wu, Xudong Chen, Minghui Shen, Liwen Qin,  
Yanyan Dou, Xuejun Duan

*School of Energy and Environment, Zhongyuan University of Technology, Zhengzhou, 450007, China*

\* Corresponding author

*E-mail addresses: liyang@zut.edu.cn*

**Table of Contents**

**Table S1.** Abundance of the MPs in water samples at each WWTP.

**Table S2.** Abundance of the MPs in sludge samples at each WWTP.

**Table S3.** Percentage of the MPs size ranges in water and sludge samples at each WWTP.

**Table S4.** Percentage of the MPs shapes in water and sludge samples at each WWTP.

**Table S5.** Percentage of the MPs colors in water and sludge samples at each WWTP.

**Table S6.** Percentage of the MPs polymer types in water and sludge samples at each WWTP.

**Table S1** Abundance of the MPs in water samples at each WWTP

| WWTP | Sampling point | Abundance (n/L) |       |       | Mean abundance (n/L) | Standard deviation |
|------|----------------|-----------------|-------|-------|----------------------|--------------------|
|      |                | Set1            | Set2  | Set3  |                      |                    |
| A    | IN             | 262.4           | 244.0 | 226.4 | 244.3                | 14.7               |
|      | STPO           | 37.6            | 41.6  | 29.6  | 36.3                 | 5.0                |
|      | OUT            | 22.4            | 18.4  | 24.0  | 21.6                 | 2.4                |
| B    | IN             | 303.2           | 288.8 | 274.4 | 288.8                | 11.8               |
|      | STPO           | 79.2            | 77.6  | 83.2  | 80.0                 | 2.4                |
|      | OUT            | 66.4            | 71.2  | 68.8  | 68.8                 | 2.0                |
| C    | IN             | 144.0           | 148.0 | 150.4 | 147.5                | 2.6                |
|      | STPO           | 31.2            | 40.8  | 47.2  | 39.7                 | 6.6                |
|      | OUT            | 16.8            | 18.4  | 27.2  | 20.8                 | 4.6                |

**Table S2** Abundance of the MPs in sludge samples at each WWTP

| WWTP | Abundance (n/kg) |         |         | Mean abundance (n/kg) | Standard deviation |
|------|------------------|---------|---------|-----------------------|--------------------|
|      | Set1             | Set2    | Set3    |                       |                    |
| A    | 28156.7          | 19923.8 | 14374.6 | 20818.4               | 5662.0             |
| B    | 9620.9           | 12788.5 | 13664.6 | 12024.7               | 1737.0             |
| C    | 16830.3          | 17248.0 | 16581.6 | 16886.6               | 274.9              |

**Table S3** Percentage of the MPs size ranges in water and sludge samples at each WWTP.

| WWTP | Sampling point | Percentage (%)      |                      |                    |
|------|----------------|---------------------|----------------------|--------------------|
|      |                | 10-50 $\mu\text{m}$ | 50-100 $\mu\text{m}$ | >100 $\mu\text{m}$ |
| A    | IN             | 77.9                | 18.8                 | 3.3                |
|      | STPO           | 83.1                | 5.9                  | 11.0               |
|      | OUT            | 62.9                | 25.9                 | 11.2               |
|      | Sludge         | 83.8                | 14.7                 | 1.5                |
| B    | IN             | 79.6                | 16.3                 | 4.1                |
|      | STPO           | 82.7                | 15.3                 | 2.0                |
|      | OUT            | 77.1                | 16.7                 | 6.2                |
|      | Sludge         | 90.4                | 8.2                  | 1.4                |
| C    | IN             | 83.2                | 11.7                 | 5.1                |
|      | STPO           | 66.4                | 22.8                 | 10.8               |
|      | OUT            | 52.6                | 24.4                 | 23.0               |
|      | Sludge         | 72.9                | 15.3                 | 11.8               |

**Table S4** Percentage of the MPs shapes in water and sludge samples at each WWTP.

| WWTP | Sampling point | Percentage (%) |          |      |          |
|------|----------------|----------------|----------|------|----------|
|      |                | Fiber          | particle | Film | Fragment |
| A    | IN             | 81.6           | 0.3      | 11.0 | 7.1      |
|      | STPO           | 83.8           | 12.5     | 1.5  | 2.2      |
|      | OUT            | 92.6           | 3.7      | 1.2  | 2.5      |
|      | Sludge         | 77.9           | /        | 16.2 | 5.9      |
| B    | IN             | 86.5           | 3.9      | 4.6  | 5.0      |
|      | STPO           | 75.3           | 1.3      | 3.3  | 20.1     |
|      | OUT            | 79.5           | 3.9      | 8.9  | 7.7      |
|      | Sludge         | 76.3           | 3.4      | 3.4  | 16.9     |
| C    | IN             | 65.8           | 3.6      | 11.4 | 19.2     |
|      | STPO           | 75.2           | 10.1     | 0.6  | 14.1     |
|      | OUT            | 78.2           | 19.2     | /    | 2.6      |
|      | Sludge         | 78.1           | 1.4      | 12.3 | 8.2      |

**Table S5** Percentage of the MPs colors in water and sludge samples at each WWTP

| WWTP | Sampling point | Percentage (%) |      |      |        |       |     |       |
|------|----------------|----------------|------|------|--------|-------|-----|-------|
|      |                | Transparent    | Gray | Blue | Yellow | Black | Red | Green |
| A    | IN             | 73.8           | 20.2 | 1.3  | 3.9    | 0.7   | /   | 0.1   |
|      | STPO           | 66.2           | 12.5 | 11.8 | 6.6    | 2.9   | /   | /     |
|      | OUT            | 64.2           | 12.3 | 6.2  | 11.1   | 6.2   | /   | /     |
|      | Sludge         | 73.5           | 23.5 | 1.5  | /      | /     | 1.5 | /     |
| B    | IN             | 86.3           | 9.9  | 0.4  | 2.7    | 0.5   | 0.2 | /     |
|      | STPO           | 57.7           | 30.0 | 0.7  | 9.3    | 1.3   | /   | 1.0   |
|      | OUT            | 69.4           | 21.6 | 0.4  | 3.9    | 4.7   | /   | /     |
|      | Sludge         | 54.8           | 20.5 | /    | 19.2   | 5.5   | /   | /     |
| C    | IN             | 37.4           | 50.5 | /    | 11.2   | 0.7   | /   | 0.2   |
|      | STPO           | 63.8           | 27.5 | 4.0  | 2.7    | /     | 2.0 | /     |
|      | OUT            | 67.9           | 11.5 | 2.6  | 11.5   | 6.5   | /   | /     |
|      | Sludge         | 35.6           | 49.2 | 3.4  | 10.2   | 1.6   | /   | /     |

**Table S6** Percentage of the MPs polymer types in water and sludge samples at each WWTP.

| WWTP | Sampling point | Percentage (%) |      |      |      |     |      |      |     |      |     |
|------|----------------|----------------|------|------|------|-----|------|------|-----|------|-----|
|      |                | PVC            | PET  | PP   | PPO  | PS  | PMMA | PE   | PA  | PTFE | POM |
| A    | IN             | 0.7            | 1.5  | 76.2 | 18.0 | 0.4 | 0.5  | 2.4  | 0.3 | /    | /   |
|      | STPO           | 0.7            | 14.0 | 54.4 | 22.8 | 5.2 | 2.9  | /    | /   | /    | /   |
|      | OUT            | 1.2            | 18.5 | 42.0 | 33.3 | /   | 2.6  | 1.2  | 1.2 | /    | /   |
|      | Sludge         | 17.6           | 5.9  | 69.1 | 1.5  | 2.9 | 1.5  | 1.5  | /   | /    | /   |
| B    | IN             | 1.1            | 0.7  | 53.2 | 42.1 | 0.6 | 0.6  | 1.7  | /   | /    | /   |
|      | STPO           | 10.3           | 23.7 | 26.7 | 34.0 | 3.0 | 0.7  | 1.3  | /   | /    | 0.3 |
|      | OUT            | 0.8            | 2.3  | 62.0 | 31.0 | 1.2 | 0.4  | 1.9  | /   | 0.4  | /   |
|      | Sludge         | 4.1            | 2.7  | 78.1 | 2.7  | 5.5 | 1.4  | 5.5  | /   | /    | /   |
| C    | IN             | 2.4            | 24.8 | 55.2 | 10.1 | 4.4 | 0.5  | 2.4  | /   | /    | 0.2 |
|      | STPO           | 1.3            | 20.8 | 38.3 | 35.6 | 0.7 | 1.3  | /    | 0.7 | /    | 1.3 |
|      | OUT            | 3.8            | 59.0 | 9.0  | 23.0 | /   | 2.6  | /    | 2.6 | /    | /   |
|      | Sludge         | 15.3           | 42.4 | 20.3 | 8.5  | 1.7 | /    | 11.8 | /   | /    | /   |
